# Supplementary material for: Laser-Based Synthesis of TiO2-Pt Photocatalysts for Hydrogen Generation
Source: MDPI journal article supplement (doi:10.3390/ma15217413), 2022-10-22
Supplement: s1 [file s1]

Supplementary Materials

# Laser-based Synthesis of TiO<sub>2</sub>-Pt Photocatalysts for Hydrogen Generation

Elena Fakhrutdinova<sup>1\*</sup>, Olesia Reutova<sup>1</sup>, Liubov Maliy<sup>2</sup>, Tamara Kharlamova<sup>2</sup>, Olga Vodyankina<sup>2</sup>, Valery Svetlichnyi<sup>1\*</sup>

<sup>1</sup> Laboratory of Advanced Materials and Technology, Tomsk State University, Tomsk 634050, Russia

<sup>2</sup> Laboratory of Catalytic Research, Tomsk State University, Tomsk 634050, Russia

\* Correspondence: fakhrutdinovaed@gmail.com (E.F.); v\_svetlichnyi@bk.ru (V.S.)

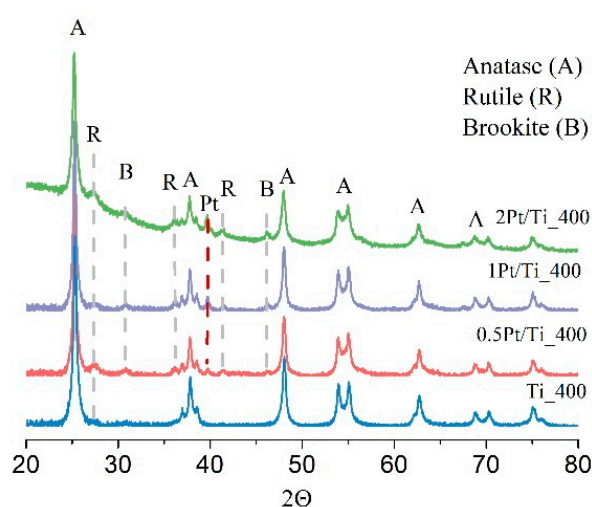

**Figure S1.** XRD pattern of dark titania samples doped with platinum.

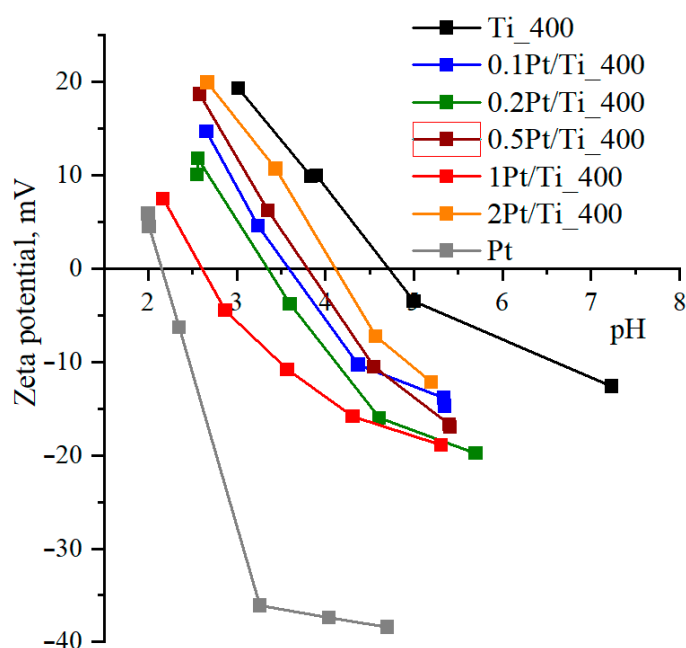

**Figure S2.** Dependence of the zeta potential of the particles on the pH of the suspension.

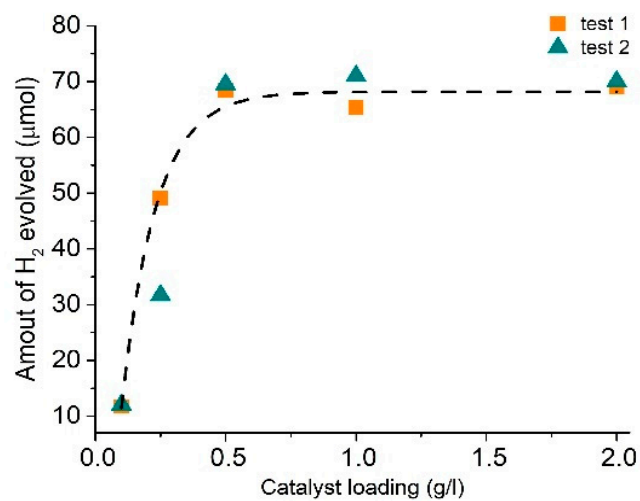

**Figure S3.** The effect of the catalyst loading for Ti\_400 and glycerol as a sacrificial agent.

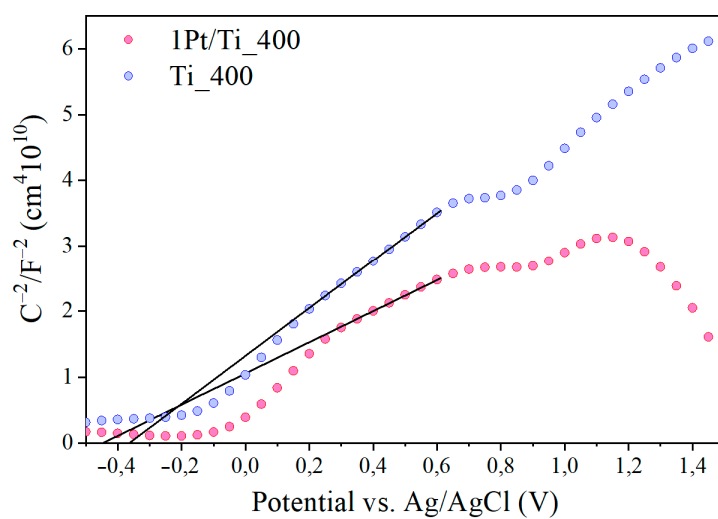

**Figure S4.** Mott-Schottky plots for Ti\_400 and 1Pt/Ti\_400 obtained in 0.1 M Na<sub>2</sub>SO<sub>4</sub> electrolyte (pH 6.42).
